# Supplementary material for: Ursolic Acid Impairs Cellular Lipid Homeostasis and Lysosomal Membrane Integrity in Breast Carcinoma Cells
Source: MDPI journal article supplement (doi:10.3390/cells11244079), 2022-12-16
Supplement: s1 [file s1]

A

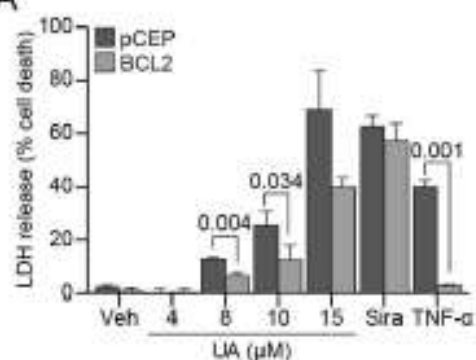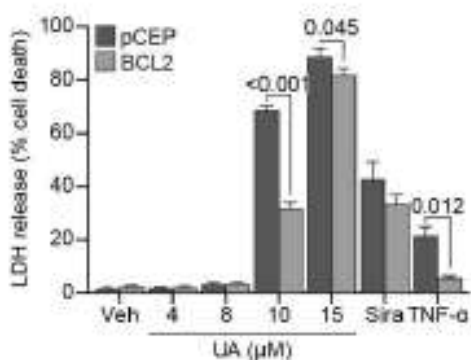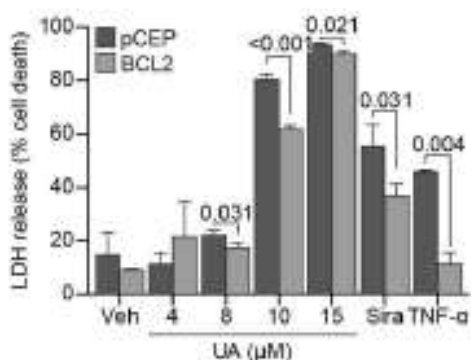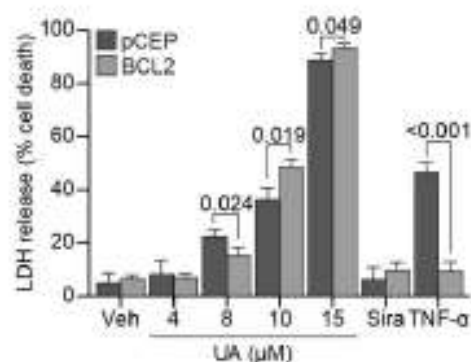

B

| HCT116 | Unpaired t with Welch's correction | Summary | Individual P Value |
|--------|------------------------------------|---------|--------------------|
|        | Veh vs. UT                         | ns      | 0.8423             |
|        | Veh vs. 4                          | ns      | 0.2233             |
|        | Veh vs. 8                          | ns      | 0.4359             |
|        | Veh vs. 10                         | ns      | 0.145              |
|        | Veh vs. 12                         | ns      | 0.1918             |
|        | Veh vs. 14                         | ns      | 0.1279             |
|        | Veh vs. 16                         | ns      | 0.275              |
|        | Veh vs. 20                         | ns      | 0.1051             |
|        | Veh vs. 25                         | *       | 0.0122             |
|        | Veh vs. 30                         | **      | 0.0011             |
| U2OS   | Unpaired t with Welch's correction | Summary | Individual P Value |
|        | Veh vs. UT                         | ns      | 0.6614             |
|        | Veh vs. 4                          | ns      | 0.3482             |
|        | Veh vs. 8                          | ns      | 0.2296             |
|        | Veh vs. 10                         | ns      | 0.2691             |
|        | Veh vs. 12                         | **      | 0.0028             |
|        | Veh vs. 14                         | ***     | 0.0001             |
|        | Veh vs. 16                         | ***     | 0.0001             |
|        | Veh vs. 20                         | ****    | <0.0001            |
| HeLa   | Unpaired t with Welch's correction | Summary | Individual P Value |
|        | Veh vs. UT                         | ns      | 0.5893             |
|        | Veh vs. 4                          | ns      | 0.1982             |
|        | Veh vs. 8                          | ns      | 0.7603             |
|        | Veh vs. 10                         | ns      | 0.1029             |
|        | Veh vs. 12                         | ns      | 0.0896             |
|        | Veh vs. 16                         | ****    | <0.0001            |
|        | Veh vs. 20                         | **      | 0.0046             |
| MCF7   | Unpaired t with Welch's correction | Summary | Individual P Value |
|        | Veh vs. UT                         | ns      | >0.9999            |
|        | Veh vs. 4                          | ns      | 0.7743             |
|        | Veh vs. 8                          | ns      | 0.0661             |
|        | Veh vs. 10                         | ns      | 0.0992             |
|        | Veh vs. 12                         | *       | 0.0332             |
|        | Veh vs. 16                         | *       | 0.0108             |
|        | Veh vs. 20                         | ***     | 0.0008             |
|        | Veh vs. 25                         | ****    | <0.0001            |
|        | Veh vs. 30                         | *       | 0.0115             |

**Supplementary figure S1.** UA kills MCF7 cells partly through apoptosis. **(A)** MCF7-*pCEP* and MCF7-*BCL2* cells were treated for 48 h with indicated concentrations of UA, 10  $\mu$ M siramesine or 200 ng/ml TNF- $\alpha$  20 (three bottom figures) and cell death was measured using LDH release assay. **(B)** Statistical tests of data from figure 1B. P-values were defined by multiple unpaired t-test with Welch's correction on the triplicates of each experiment comparing cell death in MCF7-*BCL2* to MCF7-*pCEP* for each treatment in (A) and comparing each treatment to vehicle in (B). Abbreviations: Same abbreviations as in figure 1.

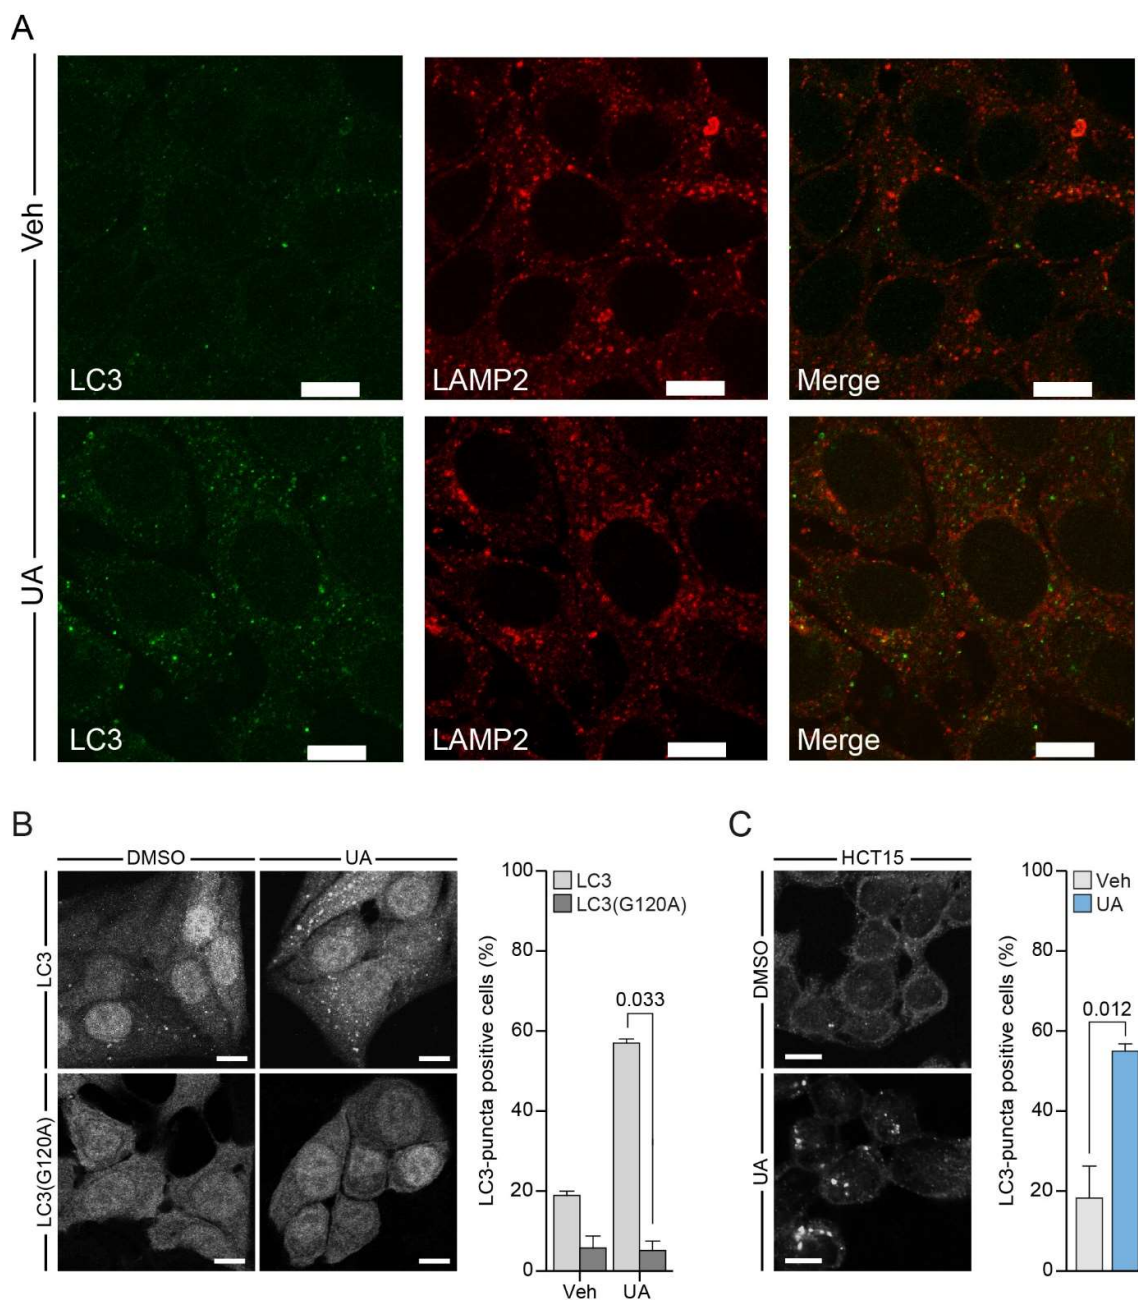

**Supplementary figure S2.** UA causes LC3 puncta formation in MCF7 and HCT15 cells. **(A)** MCF7 cells stained for LC3 (green) and LAMP2 (red) after treatment with vehicle (DMSO) or 8  $\mu$ M UA for 6 h. Bars, 10  $\mu$ m **(B)** Representative images and quantification of LC3 puncta formation in MCF7 cells expressing WT GFP-LC3 or a mutant GFP-LC3(G120A) after treatment with 8  $\mu$ M UA for 24 h. Bars, 10  $\mu$ m. n=2 for WT GFP-LC3 and n=3 for mutant GFP-LC3(G120A) **(C)** Representative images and quantification of LC3 puncta formation in HCT15 cells after treatment with vehicle (DMSO) or 8  $\mu$ M UA for 24 h. Bars, 10  $\mu$ m. P-values were defined by unpaired t-test with Welch's correction comparing WT to mutant for each treatment in (B) and unpaired t-test with Welch's correction in (C). Abbreviations: (wt) wild-type, (mut) mutant. Otherwise same abbreviations as in figure 1.

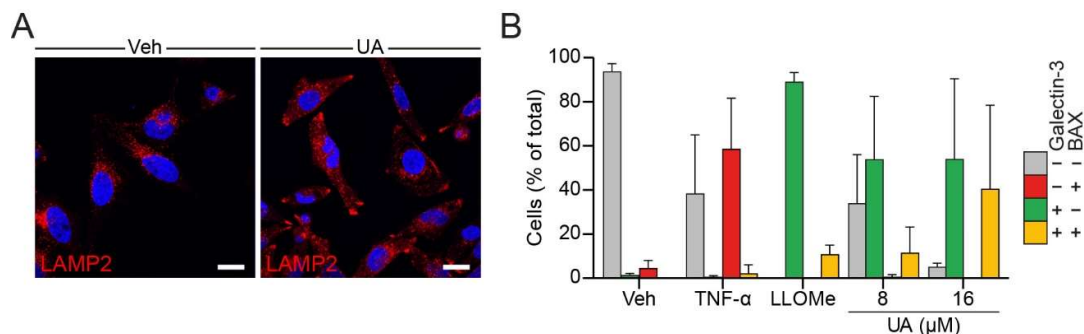

**Supplementary figure S3.** UA causes LMP prior to MOMP and alters lysosomal localization in HeLa cells. **(A)** LAMP2 staining in HeLa cells after 6 h vehicle (DMSO) or UA 20 μM treatment. Bars, 20 μm. **(B)** MCF7 cells were treated with 8 or 16 μM UA or 1.5 mM LLOMe for 6 h or with 20 ng/ml TNF-α for 24 h and co-stained for galectin-3 (green) and active BAX (red). Nuclei were labeled with Hoechst 33342 (blue). Percentages of cells with ≥ 3 galectin-3 puncta (green) or active BAX staining (red) alone or together (yellow), quantified by manual counting of 5 randomly selected fields (50-100 cells), are shown. Abbreviations: Same abbreviations as in figure 1.

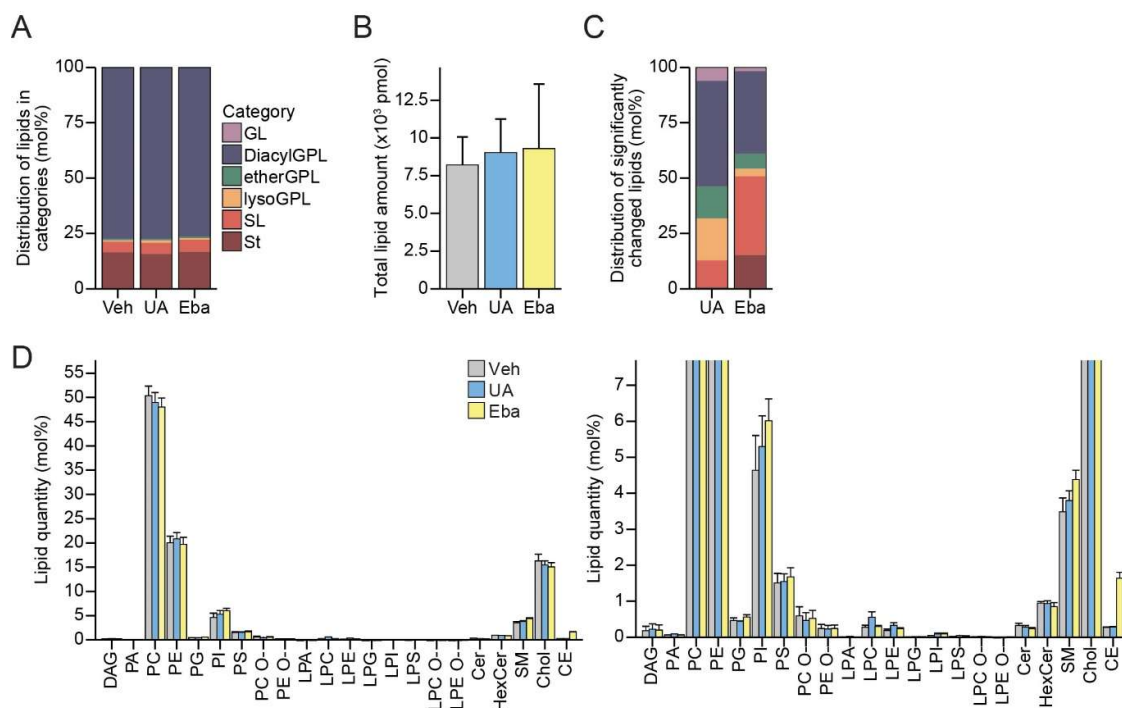

**Supplementary figure S4.** Additional lipidomics data. Lipidomics analysis of cells treated with vehicle (DMSO) for 8 h, 8 μM UA for 8 h or 5 μM ebastine for 6 h. **(A)** Distribution of lipids in the different lipid categories shown in mol% of total lipid (colored according to category). **(B)** Average lipid amount detected shown in pmol. **(C)** Distribution of significantly changed lipids in the different categories. Colored according to category. **(D)** Distribution of lipids in the different lipid classes shown for vehicle (DMSO), UA and ebastine treated cells. Colored according to treatment. Linear modelling with Benjamini-Hochberg correction was used to determine the significantly changed lipid species in (C). Linear modelling was performed on triplicates from three independent experiments (nine data points in total) accounting for batch factor. Abbreviations: (GL) glycerolipids, (St) sterol. Otherwise same abbreviations as in figure 1 and 5.

**Table S1. List of resources**

| Reagent / Chemical                                                | Source                                         | Catalogue #; CAS #                |
|-------------------------------------------------------------------|------------------------------------------------|-----------------------------------|
| Ammonium chloride                                                 | Sigma Aldrich                                  | A0171; 12125-02-9                 |
| Bovine serum albumin (BSA)                                        | VWR                                            | 422361V; 9048-46-8                |
| Clarity™ Western ECL Substrate                                    | Bio-Rad                                        | 170-5061; N/A (not applicable)    |
| Concanamycin A                                                    | Santa Cruz                                     | sc-202111; 80890-47-7             |
| Dextran, Fluorescein and Tetramethylrhodamine, 70,000 MW, Anionic | Thermo Fisher Scientific                       | D1951; N/A                        |
| Digitonin                                                         | Sigma Aldrich                                  | D141; 11024-24-1                  |
| DMSO                                                              | VWR                                            | VWRCN182, 67-68-5                 |
| Ebastine                                                          | Cayman Chemical                                | 15372, 90729-43-4                 |
| EnduRen™                                                          | Promega                                        | E6481; N/A                        |
| Geneticin (G418 Sulfate)                                          | Life Technologies                              | 11811-031, 108321-42-2            |
| Goat serum                                                        | DAKO                                           | X0907; N/A                        |
| Hoechst 33342                                                     | Sigma Aldrich                                  | B2261; 23491-52-3                 |
| Live Cell Imaging Solution                                        | Thermo Fisher Scientific                       | A14291DJ; N/A                     |
| LLoMe                                                             | Santa Cruz                                     | SC-285992, 16889-14-8             |
| Methanol                                                          | VWR                                            | 34966; 67-56-1                    |
| MiniProtean TGX gels, 15-well, 4-15%                              | Bio-Rad                                        | 456-1086; N/A                     |
| Nitrocellulose membrane                                           | Bio-Rad                                        | 170-4158; N/A                     |
| Novex™ Sharp Pre-stained Protein Standard                         | Thermo Fisher Scientific                       | LC5800; N/A                       |
| Nuclear Violet                                                    | ATT Bioquest                                   | 17543; N/A                        |
| Paraformaldehyde (PFA) in PBS                                     | Ampliqon                                       | 432.261.000, 30525-89             |
| Pierce™ BCA assay kit                                             | Thermo Fisher Scientific                       | #23225; N/A                       |
| Prolong Gold Antifade mounting medium                             | Life Technologies                              | P36930; N/A                       |
| Propidium Iodide                                                  | Sigma Aldrich                                  | P4864; 25535-16-4                 |
| Rapamycin                                                         | Sigma Aldrich                                  | R0395; 53123-88-9                 |
| Rapamycin                                                         | Sigma Aldrich                                  | 553210; 53123-88-9                |
| SiR-tubulin                                                       | Spirochrome                                    | SC002; N/A                        |
| Siramesine                                                        | Gift from Christine Volbracht, H. Lundbeck A/S | N/A, 163630-79-3                  |
| SuperSignal West Femto Maximum Sensitivity Substrate              | Thermo Fisher Scientific                       | PI34096, N/A                      |
| TNF alpha (human)                                                 | Sigma Aldrich                                  | T0157; 94948-59-1                 |
| TNF alpha (human)                                                 | Sigma Aldrich                                  | H8916; <a href="#">94948-59-1</a> |
| Triton-X-100                                                      | Sigma Aldrich                                  | T9284; 9002-93-1                  |
| Tween-20                                                          | VWR                                            | A4974.0500; 9005-64-5             |
| Ursolic Acid                                                      | Abcam                                          | ab141113; 77-52-1                 |
| Antibodies                                                        | Source                                         | Identifier                        |
| Active Bax                                                        | Cell Signaling Technology                      | 2772                              |
| GFP                                                               | Abcam                                          | ab290                             |



|                                     |                                      |                                                                                                                                                                                                           |
|-------------------------------------|--------------------------------------|-----------------------------------------------------------------------------------------------------------------------------------------------------------------------------------------------------------|
| Cathepsin B                         | Gift from Ekkehard Weber             | <a href="https://www.ncbi.nlm.nih.gov/pmc/articles/PMC4496956/#!p=35.0000">https://www.ncbi.nlm.nih.gov/pmc/articles/PMC4496956/#!p=35.0000</a>                                                           |
| Cathepsin B                         | Upstate                              | 06-480                                                                                                                                                                                                    |
| EEA1                                | Abcam                                | ab2900                                                                                                                                                                                                    |
| Galectin 3                          | Sigma Aldrich                        | MABT51                                                                                                                                                                                                    |
| HSP90                               | BD Transduction Laboratories 6       | 610418                                                                                                                                                                                                    |
| LAMP2                               | Developmental Studies Hybridoma Bank | H4B4                                                                                                                                                                                                      |
| MAP1LC3                             | Cell Signaling Technology            | 3868                                                                                                                                                                                                      |
| Mouse IgG (donkey) Alexa Fluor 488  | Thermo Fisher Scientific             | A-21202                                                                                                                                                                                                   |
| Mouse IgG (donkey) Alexa Fluor 594  | Thermo Fisher Scientific             | A21203                                                                                                                                                                                                    |
| Mouse IgG (donkey) Alexa Fluor 647  | Thermo Fisher Scientific             | A31571                                                                                                                                                                                                    |
| Mouse IgG (rabbit) HRP-conjugated   | Sigma Aldrich                        | A9044-2ML                                                                                                                                                                                                 |
| Rabbit IgG (donkey) Alexa Fluor 488 | Thermo Fisher Scientific             | A-21206                                                                                                                                                                                                   |
| Rabbit IgG (donkey) Alexa Fluor 568 | Thermo Fisher Scientific             | A10042                                                                                                                                                                                                    |
| Rabbit IgG (donkey) Alexa Fluor 594 | Thermo Fisher Scientific             | A-21207                                                                                                                                                                                                   |
| Rabbit IgG (goat) HRP-conjugated    | Vector Laboratories                  | PI-1000                                                                                                                                                                                                   |
| Total alpha tubulin                 | Abcam                                | ab15246                                                                                                                                                                                                   |
| MAP1LC3B                            | Nanotools                            | Clone                                                                                                                                                                                                     |
| KITS                                | Source                               | Identifier                                                                                                                                                                                                |
| LDH release Assay                   | Roche                                | 11644793001                                                                                                                                                                                               |
| Pierce BCA Protein Assay Kit        | Thermo Fisher Scientific             | 23225                                                                                                                                                                                                     |
| Software                            | Source                               | Identifier                                                                                                                                                                                                |
| ImageJ                              | Fiji                                 | <a href="http://www.imagej.net/Fiji">www.imagej.net/Fiji</a>                                                                                                                                              |
| LipidXplorer                        |                                      | [44]                                                                                                                                                                                                      |
| MetaXpress version 6.6.1.42         | Molecular Devices                    |                                                                                                                                                                                                           |
| Prism 9                             | GraphPad                             | <a href="https://www.graphpad.com/scientific-software/prism/">https://www.graphpad.com/scientific-software/prism/</a>                                                                                     |
| R version 4.0.5                     | R core team (2021)                   | <a href="https://www.R-project.org/">https://www.R-project.org/</a>                                                                                                                                       |
| Rstudio version 4.0.1717            | Rstudio team 2021                    | <a href="http://www.rstudio.com/">http://www.rstudio.com/</a>                                                                                                                                             |
| ScanR Acquisition software 3.1      | Olympus                              | <a href="https://www.olympus-lifescience.com/en/microscopes/inverted/scanr/#!cms[focus]=cmsContent6166">https://www.olympus-lifescience.com/en/microscopes/inverted/scanr/#!cms[focus]=cmsContent6166</a> |
| ScanR Analysis Software 3.1         | Olympus                              | <a href="https://www.olympus-lifescience.com/en/microscopes/inverted/scanr/#!cms[focus]=cmsContent6166">https://www.olympus-lifescience.com/en/microscopes/inverted/scanr/#!cms[focus]=cmsContent6166</a> |
| TIBCO Spotfire                      | TIBCO Software Inc.                  | <a href="https://www.tibco.com/products/tibco-spotfire">https://www.tibco.com/products/tibco-spotfire</a>                                                                                                 |
| Xcalibur                            | Thermo Scientific                    | OPTON-30965                                                                                                                                                                                               |

|                                                                                     |                                                       |                                                                                                                                                                     |
|-------------------------------------------------------------------------------------|-------------------------------------------------------|---------------------------------------------------------------------------------------------------------------------------------------------------------------------|
| Zen                                                                                 | Zeiss                                                 | <a href="https://www.zeiss.com/microscopy/int/products/microscope-software/zen.html">https://www.zeiss.com/microscopy/int/products/microscope-software/zen.html</a> |
| Cell culture                                                                        | Source                                                | Identifier                                                                                                                                                          |
| Dulbecco's phosphate-buffered saline (DPBS) w/o Ca <sup>2+</sup> /Mg <sup>2+</sup>  | Thermo Fisher Scientific                              | 14190-094                                                                                                                                                           |
| Dulbecco's phosphate-buffered saline (DPBS) with Ca <sup>2+</sup> /Mg <sup>2+</sup> | Thermo Fisher Scientific                              | 14040-117                                                                                                                                                           |
| Dulbecco's Modified Eagle's medium (DMEM) + GlutaMAX                                | Thermo Fisher Scientific                              | 31966-021                                                                                                                                                           |
| Fetal calf serum                                                                    | Thermo Fisher Scientific                              | 10270-106                                                                                                                                                           |
| GlutaMax Supplement                                                                 | Thermo Fisher Scientific                              | 35050-061                                                                                                                                                           |
| HCT116                                                                              | A gift from S. Shirasawa                              | [38]                                                                                                                                                                |
| HCT15, colorectal adenocarcinoma                                                    | ATCC                                                  | ATCC® CCL-225™                                                                                                                                                      |
| HeLa                                                                                | ATCC                                                  | ATCC® CCL-2™                                                                                                                                                        |
| MCF7-BCL-2                                                                          | Marja Jäättelä, Danish Cancer Society Research Center | [34]                                                                                                                                                                |
| MCF7-pCEP                                                                           | Marja Jäättelä, Danish Cancer Society Research Center | [34]                                                                                                                                                                |
| MCF7-S1, mammary adenocarcinoma (female)                                            | Marja Jäättelä, Danish Cancer Society Research Center | PubMed PMID: 7540278                                                                                                                                                |
| Minimum Essential Medium (MEM) Non-Essential Amino Acids (NEAA)                     | Thermo Fisher Scientific                              | 11140035                                                                                                                                                            |
| Penicillin/Streptomycin                                                             | Life Technologies                                     | 11811-031                                                                                                                                                           |
| RPMI 1640 Medium + GlutaMax, phenol red                                             | Thermo Fisher Scientific                              | 61870                                                                                                                                                               |
| RPMI 1640 Medium, no glutamine, no phenol red                                       | Thermo Fisher Scientific                              | 32404014                                                                                                                                                            |
| U-2-OS human osteosarcoma                                                           | ATCC                                                  | ATCC® HTB-96™                                                                                                                                                       |
| MCF7-eGFP-LC3wt                                                                     | Marja Jäättelä, Danish Cancer Society Research Center | [34]                                                                                                                                                                |
| MCF7-eGFP-LC3(G120A)                                                                | Marja Jäättelä, Danish Cancer Society Research Center | [34]                                                                                                                                                                |
| MCF7-tfLC3                                                                          | Marja Jäättelä, Danish Cancer Society Research Center | [35]                                                                                                                                                                |
| MCF-7-RLuc-LC3wt                                                                    | Marja Jäättelä, Danish Cancer Society Research Center | [36]                                                                                                                                                                |
| MCF-7-RLuc-LC3(G120A)                                                               | Marja Jäättelä, Danish Cancer Society Research Center | [36]                                                                                                                                                                |
| Plates                                                                              | Source                                                | Identifier                                                                                                                                                          |
| Screenstar 96-well                                                                  | Greinar Bio One                                       | 655866                                                                                                                                                              |

**Table S2:** Internal lipid and drug standards

| <b>Lipid class</b> | <b>Sum formula</b>   | <b>Source</b>              | <b>ID</b> | <b>Amount added (pmol)</b> |
|--------------------|----------------------|----------------------------|-----------|----------------------------|
| DAG                | DAG 12:0/12:0        | Avanti                     | 800812    | 8                          |
| PA and PA O-       | PA 12:0/12:0         | Avanti                     | 840635    | 16.34                      |
| PC and PC O-       | PC 12:0/12:0         | Avanti                     | 850335    | 20                         |
| PE and PE O-       | PE 12:0/12:0         | Avanti                     | 850702    | 20                         |
| PG and PG O-       | PG 12:0/12:0         | Avanti                     | 840435    | 11.03                      |
| BMP                | BMP 14:0/14:0        | Avanti                     | 110857    | 12                         |
| PI and PI O-       | PI 8:0/8:0           | Avanti                     | 850181    | 10.89                      |
| PS and PS O-       | PS 12:0/12:0         | Avanti                     | 840038    | 6.63                       |
| LPA and LPA O-     | LPA 17:0             | Avanti                     | 11067     | 17.64                      |
| LPC and LPC O-     | LPC 12:0             | Avanti                     | 855475    | 16                         |
| LPE and LPE O-     | LPE 13:0             | Avanti                     | 110696    | 17.36                      |
| LPG and LPG O-     | LPG 17:1             | Avanti                     | 858127    | 10.46                      |
| LPI and LPI O-     | LPI 13:0             | Avanti                     | 110716    | 11.28                      |
| LPS and LPS O-     | LPS 17:1             | Avanti                     | 858141    | 14.72                      |
| Ceramide (Cer)     | Cer 18:1;2/12:0;0    | Avanti                     | 860512    | 16                         |
| HexCer             | HexCer 18:1;2/12:0;0 | Avanti                     | 860543    | 20                         |
| SM                 | SM 18:1;2/12:0;0     | Avanti                     | 860583    | 13.62                      |
| Cholesterol        | Chol-D4              | QMX                        | D-6359    | 196.25                     |
| CE                 | CE-D7 15:0           | Avanti                     | 700144    | 17.78                      |
| Ebastine           | Ebastine-D5          | Toronto research chemicals | E320002   | 2                          |
| Carebastine        | Carebastine-D5       | Toronto research chemicals | C183442   | 2                          |

**Table S3:** Precursor ion, fragment ion, and neutral loss for lipid identification

| Lipid class                                                                       | Mode       | MS1:<br>Precursor<br>ion          | MS2:<br>Fragment<br>ion                                         | MS2:<br>Neutral loss                                                      | MS2:<br><i>m/z</i> | MS2:<br>Species<br>specifics   |
|-----------------------------------------------------------------------------------|------------|-----------------------------------|-----------------------------------------------------------------|---------------------------------------------------------------------------|--------------------|--------------------------------|
| DAG                                                                               | POS        | [M+NH <sub>4</sub> ] <sup>+</sup> |                                                                 | [Fatty acid –<br>H + NH <sub>4</sub> ]                                    |                    | All                            |
| PA, PA O <sup>-</sup> , LPA                                                       | NEG        | [M–H] <sup>-</sup>                | [Glycerophosphate –<br>H – H <sub>2</sub> O] <sup>-</sup>       |                                                                           | 152.9958           | All                            |
| PA, PA O <sup>-</sup> , LPA<br>PC, PC O <sup>-</sup> , SM,<br>LSM                 | NEG<br>POS | [M–H] <sup>-</sup>                | [Fatty acid – H] <sup>-</sup>                                   |                                                                           | *                  | PA, PA O <sup>-</sup> ,<br>LPA |
|                                                                                   |            | [M–H] <sup>-</sup>                | [Fatty acid O <sup>-</sup> – H] <sup>-</sup>                    |                                                                           | *                  | PA O <sup>-</sup>              |
|                                                                                   |            | [M+H] <sup>+</sup>                | [Phosphorylcholine +<br>H] <sup>+</sup>                         |                                                                           | 184.0733           | All                            |
| LPC, LPC O <sup>-</sup>                                                           | NEG        | [M–H] <sup>-</sup>                | [Fatty acid – H] <sup>-</sup>                                   |                                                                           | *                  | LPC                            |
| PE, PE O <sup>-</sup> , LPE,<br>LPE O <sup>-</sup>                                | NEG        | [M–H] <sup>-</sup>                | [Ethanolaminephosp<br>hate – H – H <sub>2</sub> O] <sup>-</sup> |                                                                           | 196.038            | All                            |
| PE, PE O <sup>-</sup> , LPE,<br>LPE O <sup>-</sup><br>BMP/PG, LPG                 | NEG<br>NEG | [M–H] <sup>-</sup>                | [Fatty acid – H] <sup>-</sup>                                   |                                                                           | *                  | PE, PE O <sup>-</sup> ,<br>LPE |
|                                                                                   |            | [M–H] <sup>-</sup>                | [Fatty acid O <sup>-</sup> – H] <sup>-</sup>                    |                                                                           | *                  | PE O <sup>-</sup>              |
|                                                                                   |            | [M–H] <sup>-</sup>                | [Glycerophosphate –<br>H – H <sub>2</sub> O] <sup>-</sup>       |                                                                           | 152.9958           | All                            |
| BMP/PG, LPG<br>PI, PI O <sup>-</sup> , LPI,<br>LPI O <sup>-</sup>                 | NEG<br>NEG | [M–H] <sup>-</sup>                | [Fatty acid – H] <sup>-</sup>                                   |                                                                           | *                  | BMP/PG,<br>LPG                 |
| PI, PI O <sup>-</sup> , LPI,<br>LPI O <sup>-</sup><br>PS, PS O <sup>-</sup> , LPS | NEG<br>NEG | [M–H] <sup>-</sup>                | [Glycerophosphate –<br>H – H <sub>2</sub> O] <sup>-</sup>       |                                                                           | 152.9958           | All                            |
|                                                                                   |            | [M–H] <sup>-</sup>                | [Inositolphosphate –<br>H – H <sub>2</sub> O] <sup>-</sup>      |                                                                           | 241.0119           | All                            |
|                                                                                   |            | [M–H] <sup>-</sup>                | [Fatty acid – H] <sup>-</sup>                                   |                                                                           | *                  | PI, PI O <sup>-</sup> ,<br>LPI |
| PS, PS O <sup>-</sup> , LPS,<br>LPS O <sup>-</sup>                                | NEG<br>NEG | [M–H] <sup>-</sup>                | [Fatty acid O <sup>-</sup> – H] <sup>-</sup>                    |                                                                           | *                  | PI O <sup>-</sup>              |
|                                                                                   |            | [M–H] <sup>-</sup>                | [Glycerophosphate –<br>H – H <sub>2</sub> O] <sup>-</sup>       |                                                                           | 152.9958           | All                            |
|                                                                                   |            | [M–H] <sup>-</sup>                |                                                                 | [C <sub>3</sub> H <sub>5</sub> NO <sub>2</sub> ]<br>$\Delta m/z$ : 87.032 |                    | All                            |
| PS, PS O <sup>-</sup> , LPS,<br>LPS O <sup>-</sup>                                | NEG<br>NEG | [M–H] <sup>-</sup>                | [Fatty acid – H] <sup>-</sup>                                   |                                                                           | *                  | PS, PS O <sup>-</sup> ,<br>LPS |
|                                                                                   |            | [M–H] <sup>-</sup>                | [Fatty acid O <sup>-</sup> – H] <sup>-</sup>                    |                                                                           | *                  | PS O <sup>-</sup>              |
|                                                                                   |            | [M1–2H] <sup>2+</sup>             | [Fatty acid – H] <sup>-</sup>                                   |                                                                           | *                  | All                            |



|              |                       |                                   |                                                          |          |     |
|--------------|-----------------------|-----------------------------------|----------------------------------------------------------|----------|-----|
| Cer, HexCer, | POS                   | [M+H] <sup>+</sup>                | [LCB + H – H <sub>2</sub> O] <sup>+</sup>                | *        | All |
| Cer, HexCer, | POS                   | [M+H] <sup>+</sup>                | [LCB + H – 2H <sub>2</sub> O] <sup>+</sup>               | *        | All |
|              | POS                   | [M+H] <sup>+</sup>                | [LCB + H – 2H <sub>2</sub> O] <sup>+</sup>               | *        | All |
| CE           | POS                   | [M+NH <sub>4</sub> ] <sup>+</sup> | [Chol – NH <sub>3</sub> – H <sub>2</sub> O] <sup>+</sup> | 369.3516 | All |
| Chol         | POS<br>(SIM/<br>tPRM) | [M+NH <sub>4</sub> ] <sup>+</sup> | [Chol – NH <sub>3</sub> – H <sub>2</sub> O] <sup>+</sup> | 369.3516 | All |
